# Supplementary material for: Country-level pandemic risk and preparedness classification based on COVID-19 data: A machine learning approach
Source: PubMed Central journal article supplement (PMC7592809; doi:10.1371/journal.pone.0241332), 2020-10-28
Supplement: pone.0241332.s001.pdf [file pone.0241332.s001.pdf]

## A Pearson's Correlation Coefficient for each isolated attribute towards Total Cases

| Attribute                                   | Correlation |
|---------------------------------------------|-------------|
| LAG_TOTAL-CASES-1                           | 0.99948     |
| LAG_TOTAL-CASES-MEAN-1-2                    | 0.99886     |
| LAG_TOTAL-CASES-MEAN-1-3                    | 0.998       |
| LAG_TOTAL-CASES-2                           | 0.99792     |
| LAG_TOTAL-CASES-MEAN-1-4                    | 0.9969      |
| LAG_TOTAL-CASES-MEAN-1-5                    | 0.99556     |
| LAG_TOTAL-CASES-3                           | 0.99523     |
| LAG_TOTAL-CASES-MEAN-1-6                    | 0.99398     |
| LAG_TOTAL-CASES-MEAN-1-7                    | 0.99218     |
| LAG_TOTAL-CASES-4                           | 0.99131     |
| LAG_TOTAL-CASES-5                           | 0.98602     |
| LAG_TOTAL-CASES-6                           | 0.97928     |
| LAG_TOTAL-CASES-7                           | 0.97096     |
| LAG_TOTAL-CASES-STDDEV-1-7                  | 0.91364     |
| LAG_TOTAL-CASES-STDDEV-1-6                  | 0.90624     |
| LAG_TOTAL-CASES-STDDEV-1-5                  | 0.89902     |
| LAG_TOTAL-CASES-STDDEV-1-4                  | 0.89172     |
| LAG_TOTAL-CASES-STDDEV-1-3                  | 0.8838      |
| LAG_TOTAL-CASES-STDDEV-1-2                  | 0.87316     |
| GDP-USD-2019-IMF                            | 0.42584     |
| URBAN-POP                                   | 0.24527     |
| AREA-KM2                                    | 0.19366     |
| POPULATION                                  | 0.1819      |
| MONTH                                       | 0.17737     |
| SERVICE-%-GDP                               | 0.10593     |
| MEDIAN-AGE                                  | 0.1003      |
| NURSING-AND-MIDWIFERY-PERSONNEL-(PER-10000) | 0.07837     |
| OBESITY-PREVALENCE-2016                     | 0.07483     |
| LITERACY-%                                  | 0.07457     |
| UN-REGIONAL-GROUP                           | 0.05916     |
| ARABLE-LAND-%                               | 0.05392     |
| MEDICAL-DOCTORS-(PER-10000)                 | 0.04007     |
| COUNTRY                                     | 0.03861     |
| CLIMATE-CATEGORY                            | 0.03833     |
| NET-MIGRATION                               | 0.0318      |
| DEATHRATE-(PER-1000)                        | 0.02961     |
| URBAN-POP%                                  | 0.02936     |
| CROP-LAND-%                                 | 0.00697     |
| TOBACCO-PREVALENCE-2015                     | -0.00928    |
| DAY                                         | -0.03282    |
| POP-DENSITY-KM2                             | -0.03776    |
| OTHER-LAND-%                                | -0.04997    |
| INFANT-MORTALITY-(PER-1000-BIRTHS)          | -0.06852    |
| AGRICULTURE-%-GDP                           | -0.07354    |
| INDUSTRY-%-GDP                              | -0.07616    |
| BIRTHRATE-(PER-1000)                        | -0.08499    |

## B Worthiness scores of each isolated attribute towards Total Cases according to Linear Regression

| Attribute                                   | Score      |
|---------------------------------------------|------------|
| LAG_TOTAL-CASES-1                           | 37206.701  |
| LAG_TOTAL-CASES-MEAN-1-2                    | 36607.5155 |
| LAG_TOTAL-CASES-MEAN-1-3                    | 36006.1913 |
| LAG_TOTAL-CASES-2                           | 35958.8577 |
| LAG_TOTAL-CASES-MEAN-1-4                    | 35403.6913 |
| LAG_TOTAL-CASES-MEAN-1-5                    | 34802.5844 |
| LAG_TOTAL-CASES-3                           | 34678.0896 |
| LAG_TOTAL-CASES-MEAN-1-6                    | 34204.4299 |
| LAG_TOTAL-CASES-MEAN-1-7                    | 33611.968  |
| LAG_TOTAL-CASES-4                           | 33353.2911 |
| LAG_TOTAL-CASES-5                           | 31992.3457 |
| LAG_TOTAL-CASES-6                           | 30594.2777 |
| LAG_TOTAL-CASES-7                           | 29175.4949 |
| LAG_TOTAL-CASES-STDDEV-1-7                  | 22522.4518 |
| LAG_TOTAL-CASES-STDDEV-1-6                  | 21870.8786 |
| LAG_TOTAL-CASES-STDDEV-1-5                  | 21269.9635 |
| LAG_TOTAL-CASES-STDDEV-1-4                  | 20698.2028 |
| LAG_TOTAL-CASES-STDDEV-1-3                  | 20106.7742 |
| LAG_TOTAL-CASES-STDDEV-1-2                  | 19309.0564 |
| COUNTRY                                     | 4665.2192  |
| GDP-USD-2019-IMF                            | 3531.7111  |
| UN-REGIONAL-GROUP                           | 1601.0997  |
| URBAN-POP                                   | 1151.4407  |
| AREA-KM2                                    | 686.99     |
| POPULATION                                  | 626.901    |
| MONTH                                       | 597.8549   |
| SERVICE-%-GDP                               | 203.237    |
| MEDIAN-AGE                                  | 189.8983   |
| BIRTHRATE-(PER-1000)                        | 135.914    |
| NURSING-AND-MIDWIFERY-PERSONNEL-(PER-10000) | 109.268    |
| LITERACY-%                                  | 104.3904   |
| INDUSTRY-%-GDP                              | 103.4102   |
| AGRICULTURE-%-GDP                           | 98.7466    |
| OBESITY-PREVALENCE-2016                     | 89.216     |
| INFANT-MORTALITY-(PER-1000-BIRTHS)          | 86.0903    |
| ARABLE-LAND-%                               | 54.1728    |
| OTHER-LAND-%                                | 44.6811    |
| POP-DENSITY-KM2                             | 26.7876    |
| MEDICAL-DOCTORS-(PER-10000)                 | 25.5937    |
| CLIMATE-CATEGORY                            | 19.4814    |
| NET-MIGRATION                               | 15.7625    |
| DEATHRATE-(PER-1000)                        | 14.5646    |
| URBAN-POP%                                  | 13.8685    |
| DAY                                         | 9.8493     |
| TOBACCO-PREVALENCE-2015                     | 0          |
| CROP-LAND-%                                 | 0          |

## C Worthiness scores of each isolated attribute towards Total Cases according to the M5P algorithm

| Attribute                                   | Score       |
|---------------------------------------------|-------------|
| LAG_TOTAL-CASES-1                           | 37134.73753 |
| LAG_TOTAL-CASES-MEAN-1-2                    | 36663.93786 |
| LAG_TOTAL-CASES-MEAN-1-3                    | 36247.28586 |
| LAG_TOTAL-CASES-2                           | 36203.2862  |
| LAG_TOTAL-CASES-MEAN-1-4                    | 35586.09743 |
| LAG_TOTAL-CASES-MEAN-1-5                    | 35190.87717 |
| LAG_TOTAL-CASES-3                           | 35122.90702 |
| LAG_TOTAL-CASES-MEAN-1-6                    | 34707.62698 |
| LAG_TOTAL-CASES-MEAN-1-7                    | 34132.99247 |
| LAG_TOTAL-CASES-4                           | 33936.54895 |
| LAG_TOTAL-CASES-5                           | 32651.27439 |
| LAG_TOTAL-CASES-6                           | 31400.59122 |
| LAG_TOTAL-CASES-7                           | 30309.1689  |
| LAG_TOTAL-CASES-STDDEV-1-7                  | 22646.83088 |
| LAG_TOTAL-CASES-STDDEV-1-6                  | 22104.08242 |
| LAG_TOTAL-CASES-STDDEV-1-5                  | 21565.30804 |
| LAG_TOTAL-CASES-STDDEV-1-4                  | 20959.74051 |
| LAG_TOTAL-CASES-STDDEV-1-3                  | 20214.21775 |
| LAG_TOTAL-CASES-STDDEV-1-2                  | 19551.86468 |
| COUNTRY                                     | 4660.37328  |
| MEDICAL-DOCTORS-(PER-10000)                 | 4583.2974   |
| BIRTHRATE-(PER-1000)                        | 4555.15289  |
| URBAN-POP                                   | 4553.92636  |
| ARABLE-LAND-%                               | 4540.24245  |
| DEATHRATE-(PER-1000)                        | 4529.48358  |
| NET-MIGRATION                               | 4512.49074  |
| POPULATION                                  | 4491.58778  |
| CROP-LAND-%                                 | 4486.14752  |
| AREA-KM2                                    | 4438.68472  |
| MEDIAN-AGE                                  | 4384.98746  |
| TOBACCO-PREVALENCE-2015                     | 4339.34344  |
| NURSING-AND-MIDWIFERY-PERSONNEL-(PER-10000) | 4335.73292  |
| URBAN-POP%                                  | 4314.18357  |
| INFANT-MORTALITY-(PER-1000-BIRTHS)          | 4289.45891  |
| POP-DENSITY-KM2                             | 4107.75006  |
| OTHER-LAND-%                                | 3968.00674  |
| SERVICE-%-GDP                               | 3744.12062  |
| GDP-USD-2019-IMF                            | 3531.71113  |
| OBESITY-PREVALENCE-2016                     | 3105.60779  |
| INDUSTRY-%-GDP                              | 2920.73294  |
| LITERACY-%                                  | 1422.0776   |
| AGRICULTURE-%-GDP                           | 1251.56814  |
| MONTH                                       | 825.50979   |
| UN-REGIONAL-GROUP                           | 777.71847   |
| CLIMATE-CATEGORY                            | 398.45307   |
| DAY                                         | 136.29896   |

## D Worthiness scores of each attribute towards Total Cases according to Support Vector Regression

| Attribute                                   | Score       |
|---------------------------------------------|-------------|
| LAG_TOTAL-CASES-1                           | 35615.4005  |
| LAG_TOTAL-CASES-MEAN-1-2                    | 35555.603   |
| LAG_TOTAL-CASES-MEAN-1-3                    | 35493.0074  |
| LAG_TOTAL-CASES-2                           | 354881.7026 |
| LAG_TOTAL-CASES-MEAN-1-4                    | 35432.60164 |
| LAG_TOTAL-CASES-MEAN-1-5                    | 35371.79469 |
| LAG_TOTAL-CASES-3                           | 35357.94243 |
| LAG_TOTAL-CASES-MEAN-1-6                    | 35310.31758 |
| LAG_TOTAL-CASES-MEAN-1-7                    | 35249.36718 |
| LAG_TOTAL-CASES-4                           | 35221.41054 |
| LAG_TOTAL-CASES-5                           | 35079.82154 |
| LAG_TOTAL-CASES-6                           | 34932.77621 |
| LAG_TOTAL-CASES-7                           | 34780.39    |
| LAG_TOTAL-CASES-STDDEV-1-7                  | 34090.12674 |
| LAG_TOTAL-CASES-STDDEV-1-6                  | 34030.71485 |
| LAG_TOTAL-CASES-STDDEV-1-5                  | 33973.13882 |
| LAG_TOTAL-CASES-STDDEV-1-4                  | 33921.5182  |
| LAG_TOTAL-CASES-STDDEV-1-3                  | 33869.53804 |
| LAG_TOTAL-CASES-STDDEV-1-2                  | 33781.76575 |
| COUNTRY                                     | 31914.01019 |
| URBAN-POP                                   | 31857.31578 |
| GDP-USD-2019-IMF                            | 31849.98511 |
| MONTH                                       | 31839.21394 |
| POPULATION                                  | 31831.33164 |
| CROP-LAND-%                                 | 31826.45375 |
| DAY                                         | 31826.3678  |
| LITERACY-%                                  | 31826.36209 |
| URBAN-POP%                                  | 31826.33466 |
| INFANT-MORTALITY-(PER-1000-BIRTHS)          | 31826.28948 |
| MEDIAN-AGE                                  | 31826.27703 |
| OBESITY-PREVALENCE-2016                     | 31826.26912 |
| ARABLE-LAND-%                               | 31826.26737 |
| OTHER-LAND-%                                | 31826.23384 |
| POP-DENSITY-KM2                             | 31826.21591 |
| MEDICAL-DOCTORS-(PER-10000)                 | 31826.18814 |
| BIRTHRATE-(PER-1000)                        | 31826.04445 |
| SERVICE-%-GDP                               | 31826.00056 |
| INDUSTRY-%-GDP                              | 31825.93348 |
| NURSING-AND-MIDWIFERY-PERSONNEL-(PER-10000) | 31825.92749 |
| CLIMATE-CATEGORY                            | 31825.85446 |
| TOBACCO-PREVALENCE-2015                     | 31825.82837 |
| AGRICULTURE-%-GDP                           | 31825.82704 |
| DEATHRATE-(PER-1000)                        | 31825.29397 |
| NET-MIGRATION                               | 31825.24368 |
| AREA-KM2                                    | 31824.32713 |
| UN-REGIONAL-GROUP                           | 31820.75339 |

## E Pearson's Correlation Coefficient for each isolated attribute towards Total Deaths

| Attribute                                   | Correlation |
|---------------------------------------------|-------------|
| LAG_TOTAL-DEATHS-1                          | 0.999       |
| LAG_TOTAL-DEATHS-MEAN-1-2                   | 0.9981      |
| LAG_TOTAL-DEATHS-MEAN-1-3                   | 0.9968      |
| LAG_TOTAL-DEATHS-2                          | 0.9966      |
| LAG_TOTAL-DEATHS-MEAN-1-4                   | 0.9953      |
| LAG_TOTAL-DEATHS-MEAN-1-5                   | 0.9935      |
| LAG_TOTAL-DEATHS-3                          | 0.9926      |
| LAG_TOTAL-DEATHS-MEAN-1-6                   | 0.9914      |
| LAG_TOTAL-DEATHS-MEAN-1-7                   | 0.9891      |
| LAG_TOTAL-DEATHS-4                          | 0.987       |
| LAG_TOTAL-DEATHS-5                          | 0.9802      |
| LAG_TOTAL-DEATHS-6                          | 0.9717      |
| LAG_TOTAL-DEATHS-7                          | 0.9611      |
| LAG_TOTAL-DEATHS-STDDEV-1-7                 | 0.92        |
| LAG_TOTAL-DEATHS-STDDEV-1-6                 | 0.9119      |
| LAG_TOTAL-DEATHS-STDDEV-1-5                 | 0.9028      |
| LAG_TOTAL-DEATHS-STDDEV-1-4                 | 0.8918      |
| LAG_TOTAL-DEATHS-STDDEV-1-3                 | 0.8774      |
| LAG_TOTAL-DEATHS-STDDEV-1-2                 | 0.8489      |
| GDP-USD-2019-IMF                            | 0.2581      |
| MONTH                                       | 0.1841      |
| URBAN-POP                                   | 0.1349      |
| MEDIAN-AGE                                  | 0.1331      |
| SERVICE-%-GDP                               | 0.1278      |
| POPULATION                                  | 0.0939      |
| AREA-KM2                                    | 0.0849      |
| UN-REGIONAL-GROUP                           | 0.0835      |
| CROP-LAND-%                                 | 0.0821      |
| ARABLE-LAND-%                               | 0.079       |
| LITERACY-%                                  | 0.0776      |
| MEDICAL-DOCTORS-(PER-10000)                 | 0.0717      |
| OBESITY-PREVALENCE-2016                     | 0.0673      |
| DEATHRATE-(PER-1000)                        | 0.0557      |
| NURSING-AND-MIDWIFERY-PERSONNEL-(PER-10000) | 0.0464      |
| COUNTRY                                     | 0.039       |
| URBAN-POP%                                  | 0.0367      |
| NET-MIGRATION                               | 0.0224      |
| CLIMATE-CATEGORY                            | 0.0139      |
| TOBACCO-PREVALENCE-2015                     | -0.0207     |
| DAY                                         | -0.0324     |
| POP-DENSITY-KM2                             | -0.0335     |
| INFANT-MORTALITY-(PER-1000-BIRTHS)          | -0.0854     |
| AGRICULTURE-%-GDP                           | -0.0874     |
| OTHER-LAND-%                                | -0.0927     |
| INDUSTRY-%-GDP                              | -0.0933     |
| BIRTHRATE-(PER-1000)                        | -0.1007     |

## F Worthiness scores of each isolated attribute towards Total Deaths according to Linear Regression

| Attribute                                   | Score     |
|---------------------------------------------|-----------|
| LAG.TOTAL-DEATHS-1                          | 2311.6316 |
| LAG.TOTAL-DEATHS-MEAN-1-2                   | 2270.1914 |
| LAG.TOTAL-DEATHS-MEAN-1-3                   | 2226.3242 |
| LAG.TOTAL-DEATHS-2                          | 2218.6709 |
| LAG.TOTAL-DEATHS-MEAN-1-4                   | 2183.3483 |
| LAG.TOTAL-DEATHS-MEAN-1-5                   | 2141.3606 |
| LAG.TOTAL-DEATHS-3                          | 2122.3639 |
| LAG.TOTAL-DEATHS-MEAN-1-6                   | 2100.3379 |
| LAG.TOTAL-DEATHS-MEAN-1-7                   | 2059.7627 |
| LAG.TOTAL-DEATHS-4                          | 2026.3775 |
| LAG.TOTAL-DEATHS-5                          | 1934.7969 |
| LAG.TOTAL-DEATHS-6                          | 1842.0915 |
| LAG.TOTAL-DEATHS-7                          | 1744.0319 |
| LAG.TOTAL-DEATHS-STDDEV-1-7                 | 1466.0419 |
| LAG.TOTAL-DEATHS-STDDEV-1-6                 | 1419.844  |
| LAG.TOTAL-DEATHS-STDDEV-1-5                 | 1369.5553 |
| LAG.TOTAL-DEATHS-STDDEV-1-4                 | 1313.8293 |
| LAG.TOTAL-DEATHS-STDDEV-1-3                 | 1241.3134 |
| LAG.TOTAL-DEATHS-STDDEV-1-2                 | 1119.5626 |
| COUNTRY                                     | 274.6036  |
| GDP-USD-2019-IMF                            | 77.2337   |
| UN-REGIONAL-GROUP                           | 66.7914   |
| MONTH                                       | 40.6414   |
| URBAN-POP                                   | 21.1301   |
| MEDIAN-AGE                                  | 20.8482   |
| SERVICE-%-GDP                               | 19.0241   |
| BIRTHRATE-(PER-1000)                        | 11.9017   |
| POPULATION                                  | 10.088    |
| INDUSTRY-%-GDP                              | 10.059    |
| OTHER-LAND-%                                | 10.027    |
| AGRICULTURE-%-GDP                           | 8.8834    |
| INFANT-MORTALITY-(PER-1000-BIRTHS)          | 8.4657    |
| ARABLE-LAND-%                               | 7.3922    |
| AREA-KM2                                    | 7.3879    |
| LITERACY-%                                  | 7.0868    |
| CROP-LAND-%                                 | 6.4201    |
| MEDICAL-DOCTORS-(PER-10000)                 | 5.7095    |
| OBESITY-PREVALENCE-2016                     | 4.8325    |
| DEATHRATE-(PER-1000)                        | 3.5104    |
| NURSING-AND-MIDWIFERY-PERSONNEL-(PER-10000) | 2.1441    |
| URBAN-POP%                                  | 1.4037    |
| POP-DENSITY-KM2                             | 1.3382    |
| DAY                                         | 0.6087    |
| TOBACCO-PREVALENCE-2015                     | -0.1345   |
| NET-MIGRATION                               | -0.1459   |
| CLIMATE-CATEGORY                            | -1.1914   |

## G Worthiness scores of each isolated attribute towards Total Deaths according to the M5P algorithm

| Attribute                                   | Score     |
|---------------------------------------------|-----------|
| LAG_TOTAL-DEATHS-1                          | 2311.5648 |
| LAG_TOTAL-DEATHS-MEAN-1-2                   | 2277.9243 |
| LAG_TOTAL-DEATHS-MEAN-1-3                   | 2238.0698 |
| LAG_TOTAL-DEATHS-2                          | 2234.6567 |
| LAG_TOTAL-DEATHS-MEAN-1-4                   | 2200.9028 |
| LAG_TOTAL-DEATHS-MEAN-1-5                   | 2168.7158 |
| LAG_TOTAL-DEATHS-3                          | 2143.2901 |
| LAG_TOTAL-DEATHS-MEAN-1-6                   | 2114.842  |
| LAG_TOTAL-DEATHS-MEAN-1-7                   | 2071.5819 |
| LAG_TOTAL-DEATHS-4                          | 2043.2872 |
| LAG_TOTAL-DEATHS-5                          | 1958.5161 |
| LAG_TOTAL-DEATHS-6                          | 1884.6156 |
| LAG_TOTAL-DEATHS-7                          | 1802.6213 |
| LAG_TOTAL-DEATHS-STDDEV-1-7                 | 1582.9358 |
| LAG_TOTAL-DEATHS-STDDEV-1-6                 | 1531.9202 |
| LAG_TOTAL-DEATHS-STDDEV-1-5                 | 1519.7093 |
| LAG_TOTAL-DEATHS-STDDEV-1-4                 | 1457.102  |
| LAG_TOTAL-DEATHS-STDDEV-1-3                 | 1370.7645 |
| LAG_TOTAL-DEATHS-STDDEV-1-2                 | 1354.3583 |
| COUNTRY                                     | 274.6155  |
| NURSING-AND-MIDWIFERY-PERSONNEL-(PER-10000) | 263.9846  |
| DEATHRATE-(PER-1000)                        | 263.9541  |
| POPULATION                                  | 263.3408  |
| CROP-LAND-%                                 | 261.063   |
| MEDICAL-DOCTORS-(PER-10000)                 | 260.1356  |
| AREA-KM2                                    | 259.7726  |
| GDP-USD-2019-IMF                            | 257.4675  |
| NET-MIGRATION                               | 254.6027  |
| POP-DENSITY-KM2                             | 254.3377  |
| URBAN-POP                                   | 251.8644  |
| BIRTHRATE-(PER-1000)                        | 250.8911  |
| MEDIAN-AGE                                  | 244.8103  |
| OTHER-LAND-%                                | 240.1885  |
| TOBACCO-PREVALENCE-2015                     | 236.1389  |
| INFANT-MORTALITY-(PER-1000-BIRTHS)          | 232.9417  |
| ARABLE-LAND-%                               | 207.0676  |
| URBAN-POP%                                  | 197.8494  |
| SERVICE-%-GDP                               | 194.2973  |
| OBESITY-PREVALENCE-2016                     | 131.9728  |
| INDUSTRY-%-GDP                              | 98.598    |
| LITERACY-%                                  | 76.2611   |
| UN-REGIONAL-GROUP                           | 62.7297   |
| MONTH                                       | 57.6035   |
| AGRICULTURE-%-GDP                           | 56.3932   |
| CLIMATE-CATEGORY                            | 15.7606   |
| DAY                                         | 12.4268   |

## H Worthiness scores of each attribute towards Total Deaths according to Support Vector Regression

| Attribute                                   | Score      |
|---------------------------------------------|------------|
| LAG_TOTAL-DEATHS-1                          | 18807.512  |
| LAG_TOTAL-DEATHS-MEAN-1-2                   | 18767.7191 |
| LAG_TOTAL-DEATHS-MEAN-1-3                   | 18723.1037 |
| LAG_TOTAL-DEATHS-2                          | 18714.5615 |
| LAG_TOTAL-DEATHS-MEAN-1-4                   | 18680.1828 |
| LAG_TOTAL-DEATHS-MEAN-1-5                   | 18637.6544 |
| LAG_TOTAL-DEATHS-3                          | 18619.2813 |
| LAG_TOTAL-DEATHS-MEAN-1-6                   | 18595.0416 |
| LAG_TOTAL-DEATHS-MEAN-1-7                   | 18554.6694 |
| LAG_TOTAL-DEATHS-4                          | 18519.1105 |
| LAG_TOTAL-DEATHS-5                          | 18424.2527 |
| LAG_TOTAL-DEATHS-6                          | 18331.3825 |
| LAG_TOTAL-DEATHS-7                          | 18231.8148 |
| LAG_TOTAL-DEATHS-STDDEV-1-7                 | 17918.0277 |
| LAG_TOTAL-DEATHS-STDDEV-1-6                 | 17874.6538 |
| LAG_TOTAL-DEATHS-STDDEV-1-5                 | 17821.7866 |
| LAG_TOTAL-DEATHS-STDDEV-1-4                 | 17767.3844 |
| LAG_TOTAL-DEATHS-STDDEV-1-3                 | 17712.9526 |
| LAG_TOTAL-DEATHS-STDDEV-1-2                 | 17607.9313 |
| COUNTRY                                     | 16496.2543 |
| URBAN-POP                                   | 16463.8353 |
| GDP-USD-2019-IMF                            | 16462.201  |
| MONTH                                       | 16461.9899 |
| POP-DENSITY-KM2                             | 16461.8997 |
| DAY                                         | 16461.7064 |
| MEDICAL-DOCTORS-(PER-10000)                 | 16461.4527 |
| UN-REGIONAL-GROUP                           | 16461.4101 |
| SERVICE-%-GDP                               | 16461.3989 |
| MEDIAN-AGE                                  | 16461.3557 |
| OTHER-LAND-%                                | 16461.3514 |
| URBAN-POP%                                  | 16461.3478 |
| NURSING-AND-MIDWIFERY-PERSONNEL-(PER-10000) | 16461.3001 |
| INDUSTRY-%-GDP                              | 16461.2699 |
| LITERACY-%                                  | 16461.2593 |
| CLIMATE-CATEGORY                            | 16461.2529 |
| AGRICULTURE-%-GDP                           | 16461.2218 |
| OBESITY-PREVALENCE-2016                     | 16461.1998 |
| INFANT-MORTALITY-(PER-1000-BIRTHS)          | 16461.1568 |
| CROP-LAND-%                                 | 16461.1114 |
| BIRTHRATE-(PER-1000)                        | 16461.0429 |
| ARABLE-LAND-%                               | 16460.9936 |
| TOBACCO-PREVALENCE-2015                     | 16460.9202 |
| DEATHRATE-(PER-1000)                        | 16460.6551 |
| NET-MIGRATION                               | 16460.5256 |
| AREA-KM2                                    | 16458.954  |
| POPULATION                                  | 16458.3098 |
